# Supplementary material for: Hybrid organic–inorganic lead bromide perovskite supercrystals self-assembled with l-cysteine and their good luminescence properties
Source: Royal Society of Chemistry journal article supplement (doi:10.1039/c8tc03668c), 2018-01-01
Supplement: c8tc03668c1.pdf [file c8tc03668c1.pdf]

## ELECTRONIC SUPPLEMENTARY INFORMATION

# Hybrid Organic-inorganic Lead Bromide Perovskite Supercrystals Self-Assembled with L-cysteine and Their Highly Luminescent Properties

Sangni Wang<sup>a</sup>, Liya Zhou<sup>a</sup>, Furong Huang<sup>a</sup>, Youling Xin<sup>a</sup>, Peng Jin<sup>a</sup>, Qiuxia Ma<sup>a</sup>, Qi Pang<sup>a\*</sup>, Yibo Chen<sup>b\*</sup>, Jin Zhong Zhang<sup>c</sup>

<sup>a</sup> School of Chemistry and Chemical Engineering Guangxi University/Guangxi Key Laboratory of Electrochemical Energy Materials, 100 University Road, Nanning 530004, China.

<sup>b</sup> School of Chemistry and Chemical Engineering, Guangzhou University, Guangzhou 510006, P. R. China.

<sup>c</sup> Department of Chemistry and Biochemistry, University of California, Santa Cruz, California 95064, USA.

\*Corresponding author email: [pqigx@163.com](mailto:pqigx@163.com) and [chenyibo@gzhu.edu.cn](mailto:chenyibo@gzhu.edu.cn)

| <b>Table of Content</b>                                                                                                                  |    |
|------------------------------------------------------------------------------------------------------------------------------------------|----|
| <b>Table S1.</b> Surface elemental stoichiometry data.                                                                                   | S2 |
| <b>Figure S1.</b> Photographs of PNCs-Cys under room light and UV light.                                                                 | S2 |
| <b>Figure S2.</b> PL emission spectra of the PNCs-Cys-60 and PNCs-Cys-84; TRPL spectra of PNCs-Cys-84                                    | S3 |
| <b>Figure S3.</b> Absorption spectra and PL emission spectra of PNCs-Cys-60 prepared with different contents of L-Cys capping ligands.   | S3 |
| <b>Figure S4.</b> Transmission electron microscopy (TEM) images of PNCs-Cys-60 prepared with different content of L-cys capping ligands. | S4 |
| <b>Figure S5.</b> PL emission spectra of PNCs-Ala and PNCs-Cys.                                                                          | S4 |
| <b>Figure S6.</b> PL intensity of PNCs-Ala-60 concentration on time in ethonal.                                                          | S5 |
| <b>Figure S7.</b> Emission spectra of PeLEDs.                                                                                            | S5 |

**Table S1.** Surface elemental stoichiometry for PNCs-Cys and bulk materials.

| sample   | Br:Pb ratio |
|----------|-------------|
| Bulk     | 2.9         |
| PNCs-Cys | 3.2         |

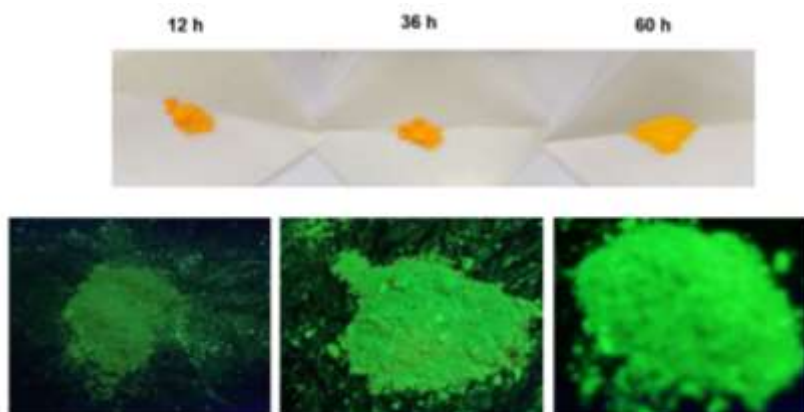

**Figure S1.** Photographs of PNCs-Cys prepared with different aging times under room light and UV light (365 nm) irradiation.

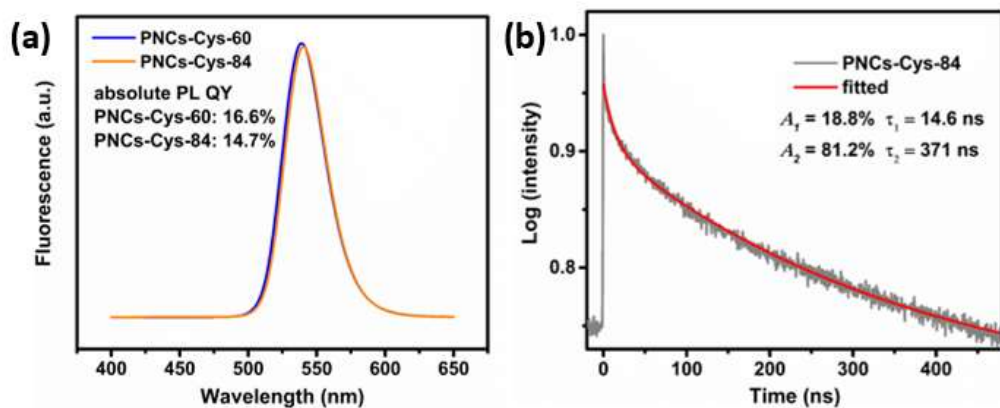

**Figure S2.** (a) PL spectra ( $\lambda_{\text{ex}} = 395$  nm) of PNCs-Cys-60 and PNCs-Cys-84, (b) the TRPL spectra of PNCs-Cys-84 displayed on a logarithmic intensity scale ( $\lambda_{\text{ex}} = 395$  nm).

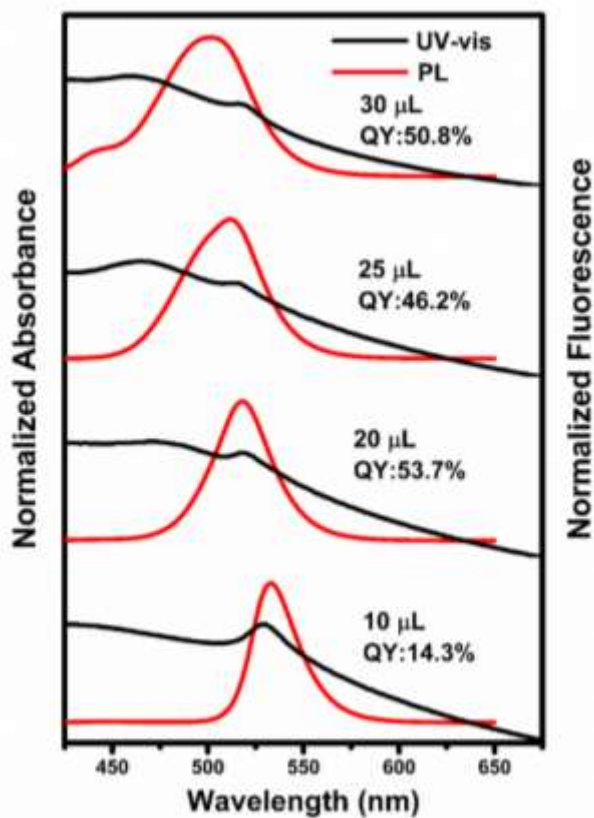

**Figure S3.** UV-Vis (black line) and PL (red line) spectra ( $\lambda_{\text{ex}} = 395$  nm) of PNCs-Cys-60 prepared with different contents of L-Cys capping ligands in toluene.

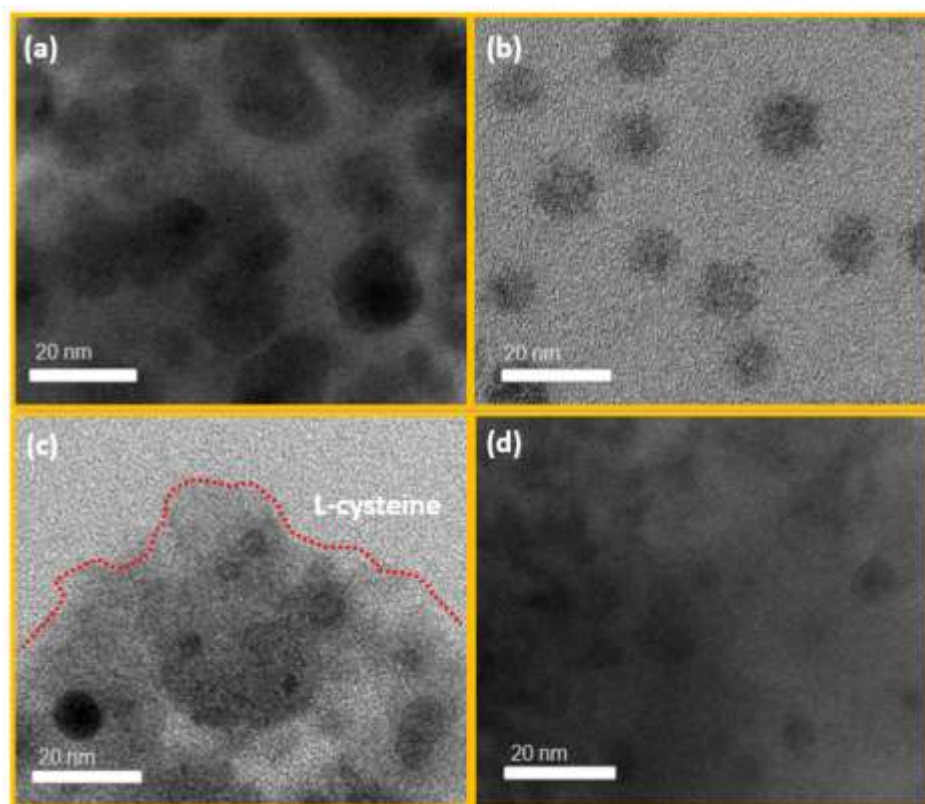

**Figure S4.** TEM image of PNCs-Cys-60 prepared with (a) 10  $\mu\text{L}$  L-cys, (b) 20  $\mu\text{L}$  L-cys, (c) 25  $\mu\text{L}$  L-cys and (d) 30  $\mu\text{L}$  L-cys. Inset: HRTEM image.

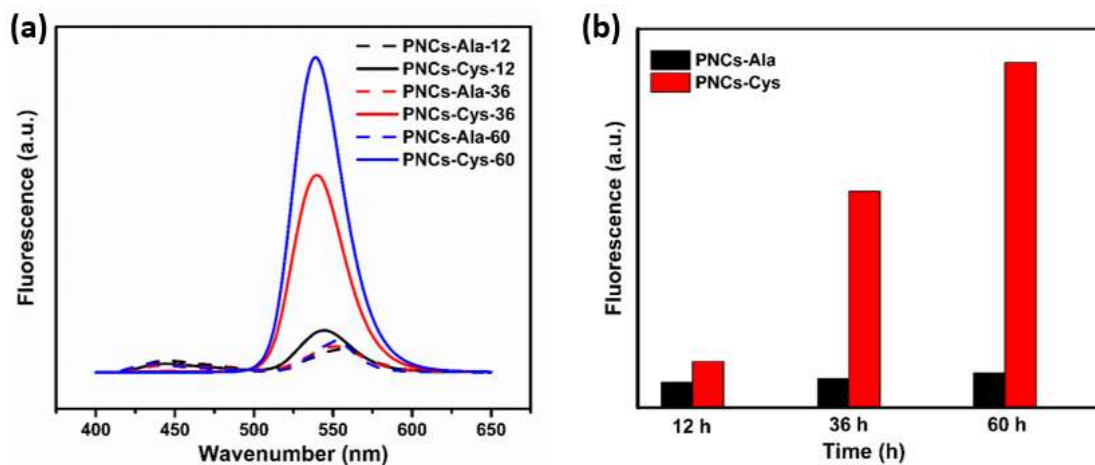

**Figure S5.** (a) PL spectra ( $\lambda_{\text{ex}} = 395 \text{ nm}$ ) of PNCs-Ala and PNCs-Cys, (b) Histogram of PL intensity for PNCs-Ala and PNCs-Cys.

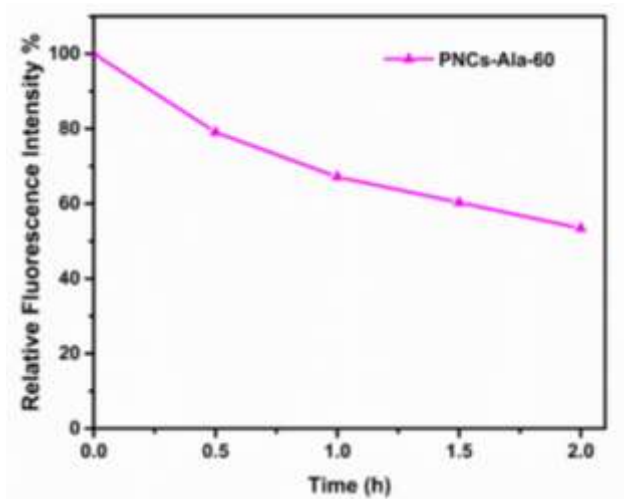

**Figure S6.** The relative fluorescence intensity of 0.50 mg/mL PNCs-Ala-60 concentration on time in ethanol.

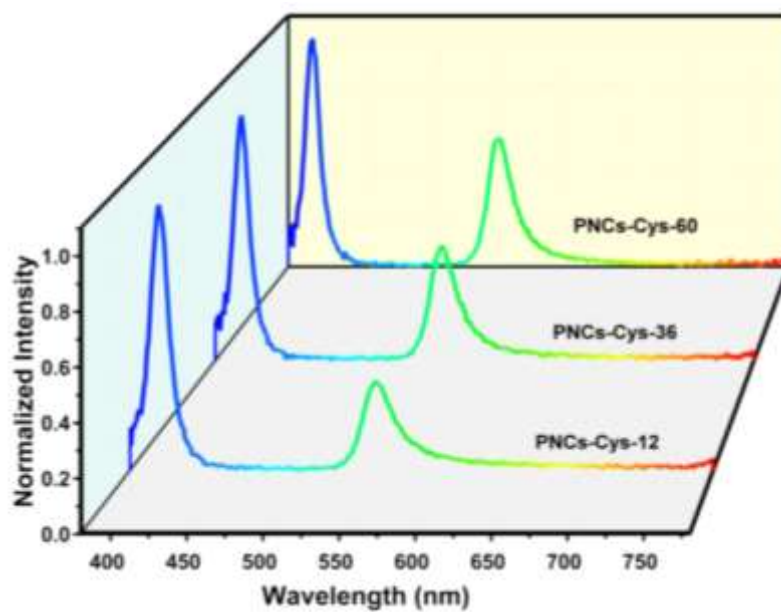

**Figure S7.** Emission spectra of PeLEDs based on aging time dependent PNCs-Cys.
